# Supplementary material
Source: publisher figshare collection journal article supplement (https://karger.figshare.com/ndownloader/files/25029167)
Supplement: Supplementary file 1 [file 25029167]

Supplementary table 3. Association between vascular pattern and the use of PPI.

|  | Vascular pattern | | | *P* value |
| --- | --- | --- | --- | --- |
| Regular  n = 1 | Irregular  n = 76 | Absent  n = 48 |
| Proton pump inhibitor  Present  Absent | 0 (0)  1 (100) | 18 (24)  58 (76) | 14 (29)  34 (71) | 0.652 |

Data are presented as *n* (%).
